# Supplementary material
Source: PubMed Central journal article supplement (PMC5998917)
Supplement: ba014811-suppl1.pdf [file ba014811-suppl1.pdf]

## Supplements

**Table S1**

| <b>Antigen</b>    | <b>Clone</b> | <b>Isotype</b> | <b>Label</b>  | <b>Dilution</b> | <b>Manufacturer</b> |
|-------------------|--------------|----------------|---------------|-----------------|---------------------|
| <b>CD3</b>        | SK7          | mouse IgG1     | APC-H7        | 1:50            | BD Pharmingen™      |
| <b>CD3 (LIN)</b>  | HIT3a        | mouse IgG2a    | FITC          | 1:100           | BD Pharmingen™      |
| <b>CD4</b>        | RPA-T4       | mouse IgG1     | Pacific Blue™ | 1:50            | BD Pharmingen™      |
| <b>CD8</b>        | RPA-T8       | mouse IgG1     | V500          | 1:50            | BD Horizon™         |
| <b>CD11b</b>      | ICRF11       | mouse IgG1     | APC-Cy7       | 1:50            | BD Pharmingen™      |
| <b>CD14</b>       | MφP9         | mouse IgG2b    | PE-Cy7        | 1:50            | BD Pharmingen™      |
| <b>CD15</b>       | HI98         | Mouse IgM      | APC           | 1:100           | BD Pharmingen™      |
| <b>CD19 (LIN)</b> | HIB19        | mouse IgG1     | FITC          | 1:100           | BD Pharmingen™      |
| <b>CD25</b>       | M-A251       | mouse IgG1     | PE-Cy7        | 1:50            | BD Pharmingen™      |
| <b>CD33</b>       | P67.6        | mouse IgG1     | PE            | 1:100           | BioLegend®          |
| <b>CD45</b>       | HI30         | mouse IgG1     | AF700         | 1:50            | BD Pharmingen™      |
| <b>CDD45</b>      | 2D1          | mouse IgG1     | V450          | 1:50            | BD Horizon™         |
| <b>CD56 (LIN)</b> | B159         | mouse IgG1     | FITC          | 1:100           | BD Pharmingen™      |
| <b>CD127</b>      | HIL-7R-M21   | mouse IgG1     | FITC          | 1:50            | BD Pharmingen™      |
| <b>Foxp3</b>      | 259D/C7      | mouse IgG1     | PE            | 1:25            | BD Pharmingen™      |
| <b>HLA-DR</b>     | G46-6        | mouse IgG2a    | V500          | 1:50            | BD Horizon™         |
| <b>PD-1</b>       | MIH4         | mouse IgG1     | FITC          | 1:10            | BD Pharmingen™      |
| <b>PD-L1</b>      | MIH1         | mouse IgG1     | BV605         | 1:50            | BD OptiBuild™       |

**Abbreviations:** AF: Alexa Fluor; APC: allophycocyanin, BV: brilliant violett, CD: cluster of differentiation, FITC: fluorescein isothiocyanate, Foxp3: forkhead box p3; HLA: human leukocyte antigen; LIN: lineage; PD: programmed death; PD-L: programmed death ligand; PE: phycoerythrin; Ig: immunoglobulin

Figure S1

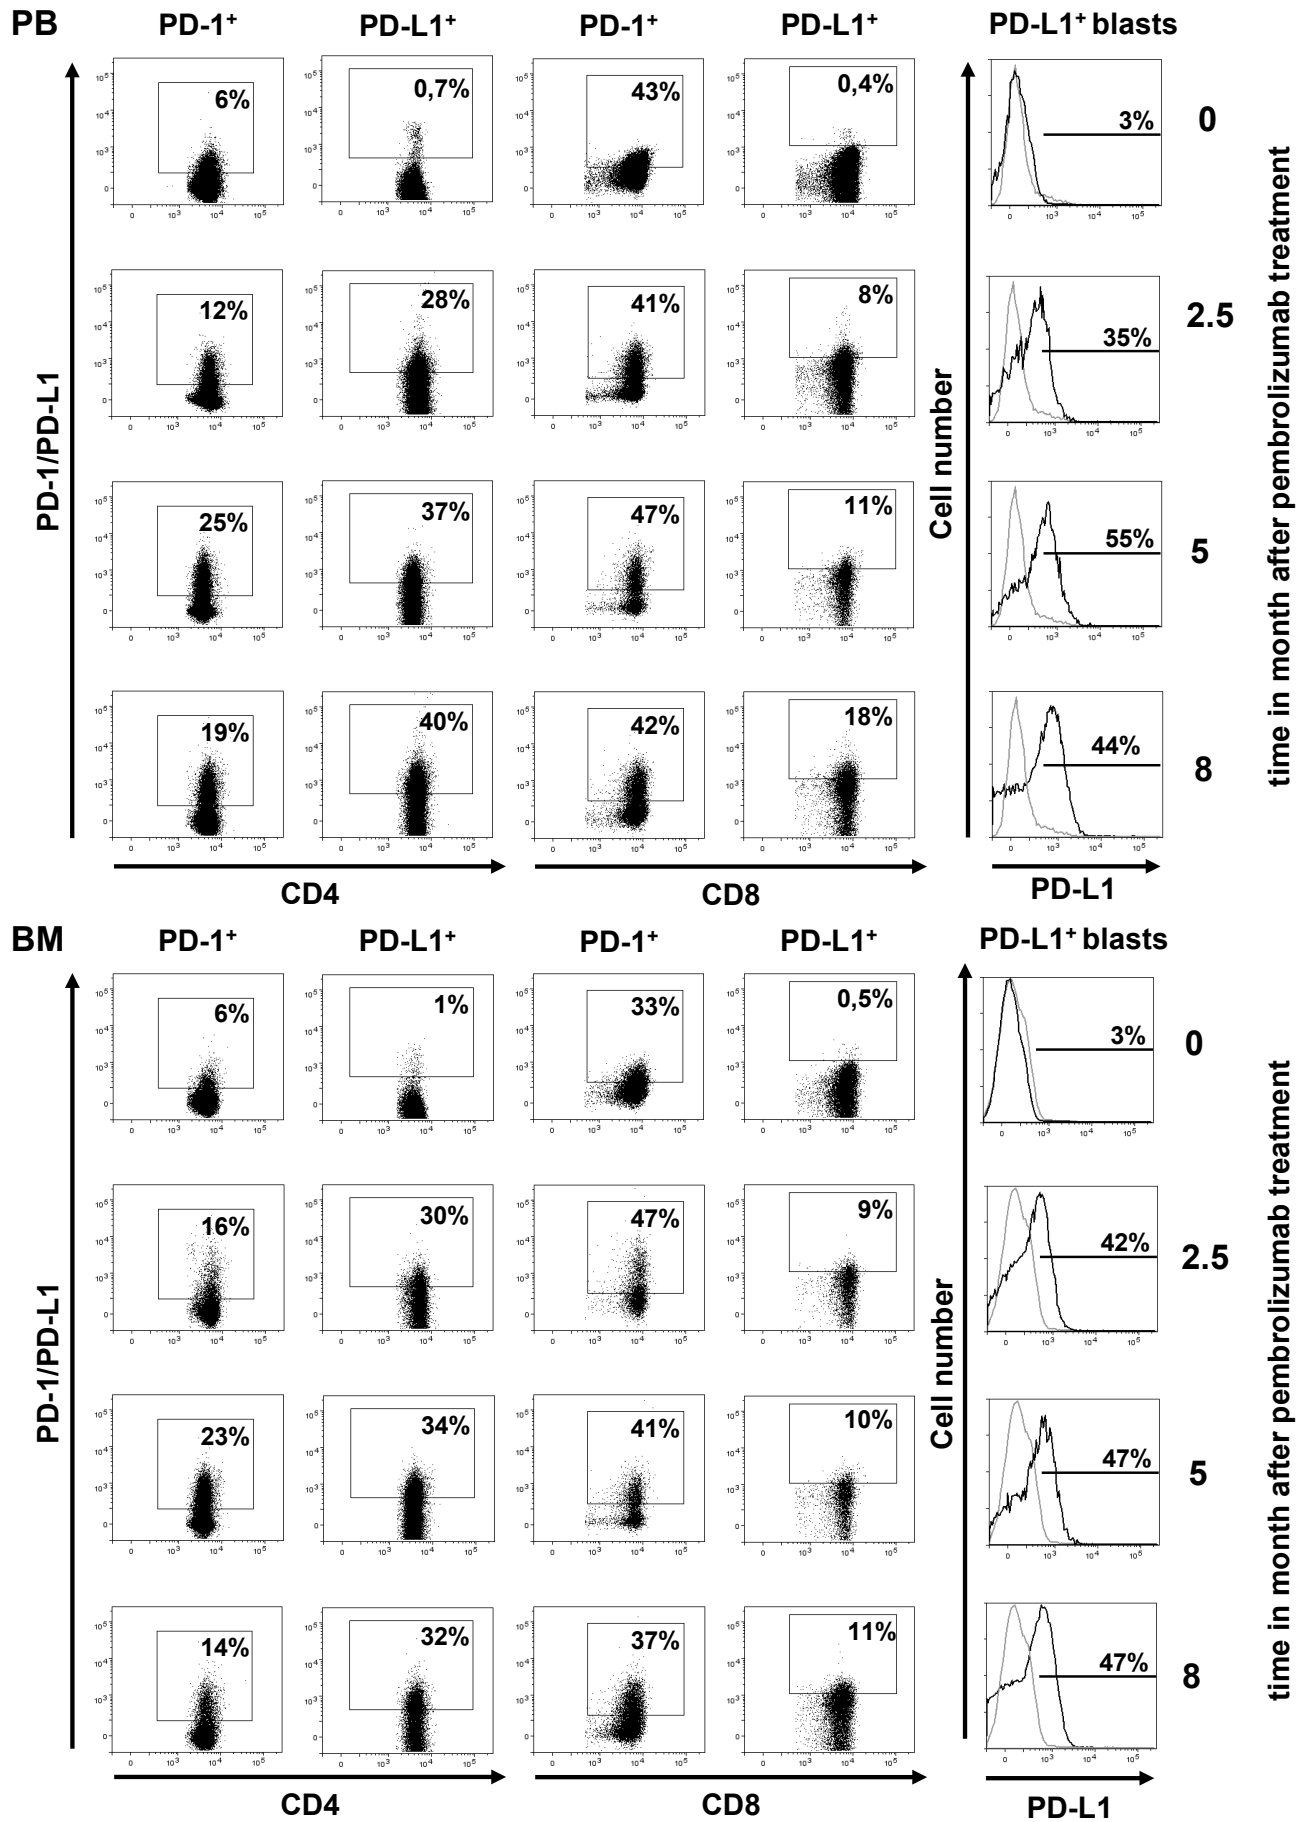

Figure S2

A

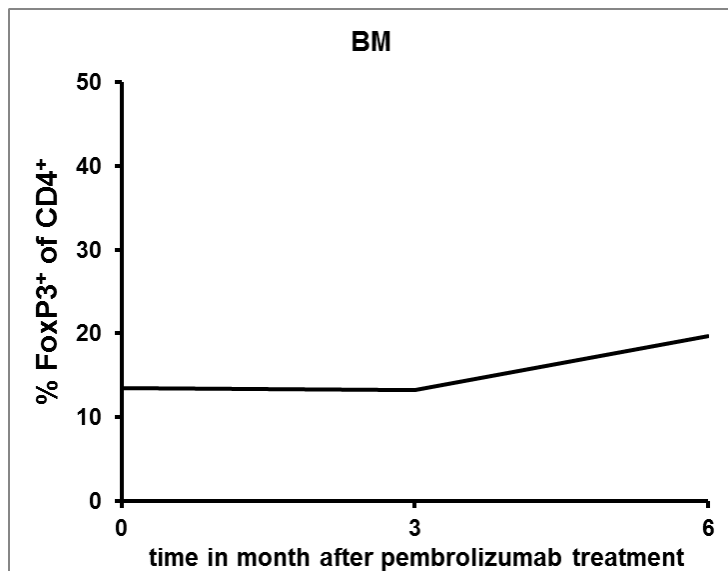

B

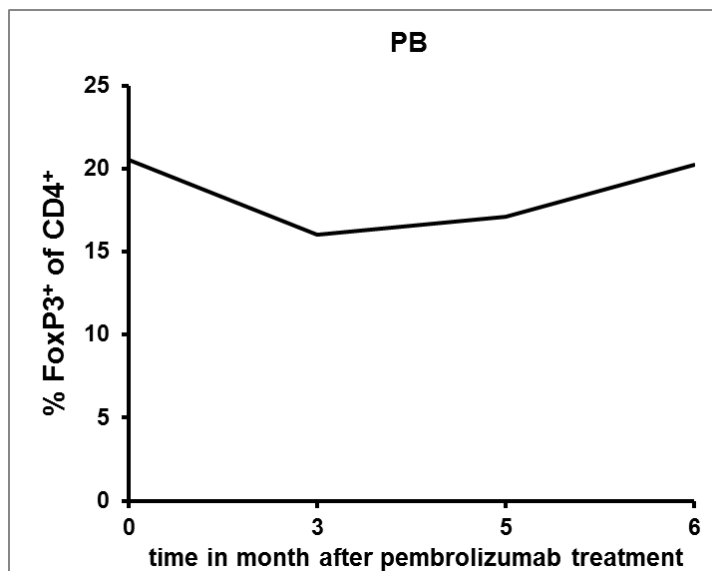

C

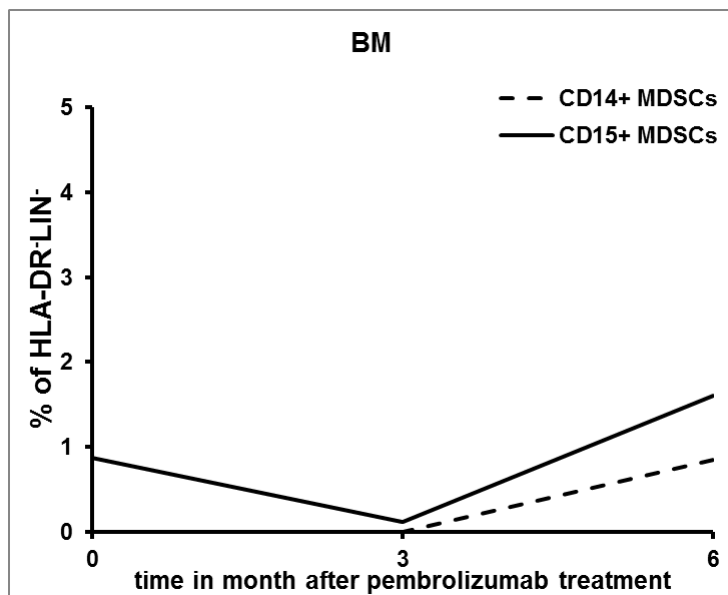

D

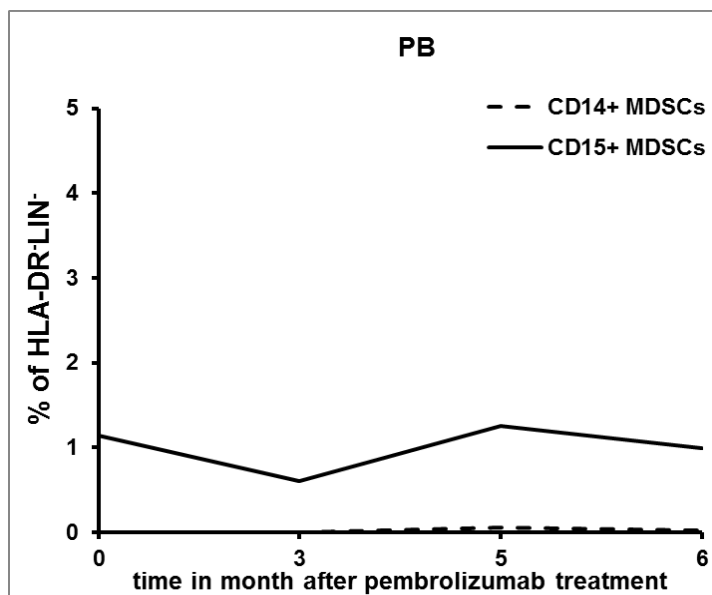

Figure S3

A

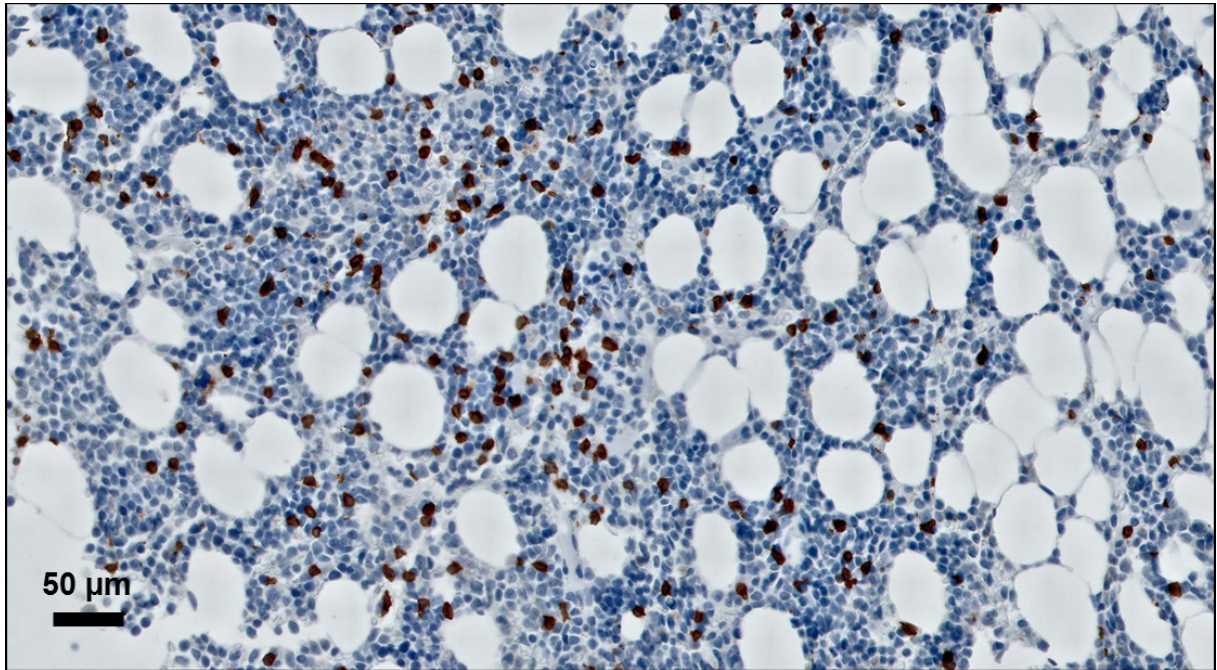

B

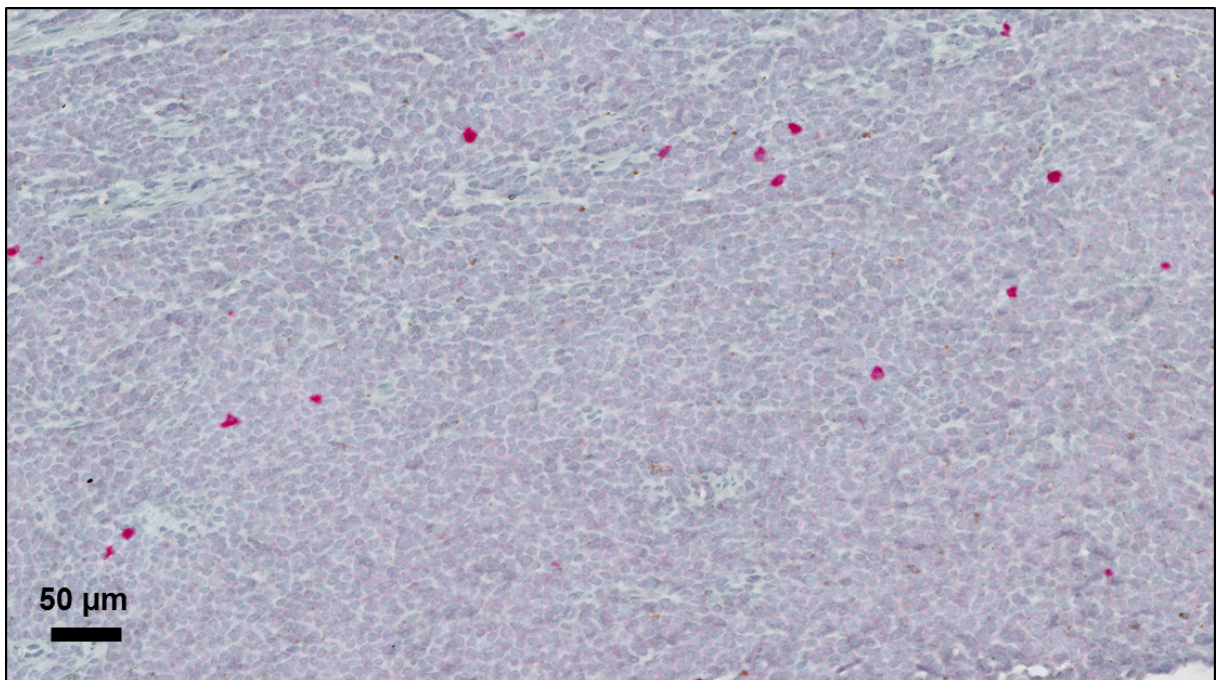

## Supplement Figure Legends

### Figure S1

**Single graphs to illustrate the expression of PD-L1 and PD-1 on AML blasts and T cells.** PB- and BM-derived AML blasts and T cells were stained with fluorochrome-conjugated antibodies and detected by flow cytometry prior and at three time points during PEM treatment. T cells were characterized as CD45<sup>+</sup>, CD3<sup>+</sup> and CD4<sup>+</sup> or CD8<sup>+</sup> populations. CD8<sup>+</sup> T and CD4<sup>+</sup> T cells were analyzed for their expression of PD-1 and PD-L1. Values in the dot plots show the percentages of cells stained positive for each molecule compared to unstained cells (not shown). Blasts were defined as CD45<sup>low</sup> cells and stained for PD-L1 expression. Values in the histograms represent the percentages of cells stained positive for PD-L1 (black) compared to unstained (grey) cells.

### Figure S2

**The frequency of Treg cells and MDSCs.** BM (A, C) and PB (B, D) samples were stained with fluorochrome-conjugated antibodies and analyzed by flow cytometry to detect Treg cells and MDSCs prior and during PEM treatment. (A, B) Treg cells were characterized as CD45<sup>+</sup>, CD3<sup>+</sup>, CD4<sup>+</sup>, CD25<sup>+</sup>, CD127<sup>-</sup> and Foxp3<sup>+</sup>. (C, D) MDSCs were defined as CD45<sup>+</sup>, LIN<sup>-</sup>, HLA-DR<sup>-</sup>, CD33<sup>+</sup> and CD11b<sup>+</sup> to identify a monocytic (CD14<sup>+</sup>) and a granulocytic (CD15<sup>+</sup>) subset. Values in the graphs represent the percentage of cells stained positive for each molecule at indicated different time points.

### Figure S3

**Lymphocyte infiltration into BM and melanoma tissue.** (A, B) Immunohistochemical stainings on formalin-fixed, paraffin-embedded tissues were performed to detect CD3<sup>+</sup> T cells in BM tissue one month after start of PEM treatment (A) and in melanoma tissue prior to PEM therapy (B). CD3<sup>+</sup> T cells were visualized by 3,3'-Diaminobenzidine (A) or alkaline phosphatase (B) staining. Sections were counterstained with Mayer's hematoxylin.
